# Supplementary material for: Glycosylation of recombinant adeno-associated virus serotype 6
Source: PubMed Central journal article supplement (PMC11107246; doi:10.1016/j.omtm.2024.101256), 2024-04-25
Supplement: mmc1.pdf [file mmc1.pdf]

**Supplemental information**

**Glycosylation of recombinant**

**adeno-associated virus serotype 6**

**Yuki Yamaguchi, Kentaro Ishii, Sachiko Koizumi, Hiroaki Sakaue, Takahiro Maruno, Mitsuko Fukuhara, Risa Shibuya, Yasuo Tsunaka, Aoba Matsushita, Karin Bandoh, Tetsuo Torisu, Chie Murata-Kishimoto, Azusa Tomioka, Saho Mizukado, Hiroyuki Kaji, Yuji Kashiwakura, Tsukasa Ohmori, Atsushi Kuno, and Susumu Uchiyama**

**Table S1.** Sample information of the lectin microarrays used for the PCA analysis shown in Figure 1B. The number and color correspond to the dot in PCA score plot.

| The dot number | Sample   | Amount (vg)        |
|----------------|----------|--------------------|
| 1              | Sample 1 | $2.5 \times 10^9$  |
| 2              | Sample 1 | $1 \times 10^{10}$ |
| 3              | Sample 1 | $4 \times 10^{10}$ |
| 4              | Sample 2 | $2.5 \times 10^9$  |
| 5              | Sample 2 | $1 \times 10^{10}$ |
| 6              | Sample 2 | $4 \times 10^{10}$ |
| 7              | Sample 3 | $2.5 \times 10^9$  |
| 8              | Sample 3 | $1 \times 10^{10}$ |
| 9              | Sample 3 | $4 \times 10^{10}$ |
| 10             | Sample 3 | $2.5 \times 10^9$  |
| 11             | Sample 4 | $2.5 \times 10^9$  |
| 12             | Sample 4 | $1 \times 10^{10}$ |
| 13             | Sample 4 | $4 \times 10^{10}$ |
| 14             | Sample 5 | $2.5 \times 10^9$  |
| 15             | Sample 5 | $1 \times 10^{10}$ |
| 16             | Sample 5 | $4 \times 10^{10}$ |
| 17             | Sample 6 | $2.5 \times 10^9$  |
| 18             | Sample 6 | $5 \times 10^9$    |

**Table S2.** The list of identified proteins contaminating Sample 4.

Several bovine serum proteins (colored blue) and human galectin 3-binding protein (colored red) were identified in Sample 4.

| Accession                                  | -10lgP | Coverage (%) | Area     | #Peptides | Avg. Mass | Description                                                                                 |
|--------------------------------------------|--------|--------------|----------|-----------|-----------|---------------------------------------------------------------------------------------------|
| VP1_AAV6                                   | 215.39 | 74           | 3.81E+08 | 47        | 81411     | VP1_AAV6                                                                                    |
| <a href="#">#CONTAM#Q7SIH1 A2MG_BOVIN</a>  | 241.3  | 66           | 3.35E+08 | 77        | 167575    | Alpha-2-macroglobulin OS=Bos taurus OX=9913 GN=A2M PE=1 SV=2                                |
| <a href="#">#CONTAM#A7E3W2 LG3BP_BOVIN</a> | 174.09 | 40           | 6.08E+07 | 18        | 62127     | <a href="#">Galectin-3-binding protein OS=Bos taurus OX=9913 GN=LGALS3BP PE=1 SV=1</a>      |
| <a href="#">#CONTAM#Q3Y5Z3 ADIPO_BOVIN</a> | 115.09 | 32           | 2.42E+07 | 6         | 26133     | Adiponectin OS=Bos taurus OX=9913 GN=ADIPOQ<br>PE=1 SV=1                                    |
| <a href="#">#CONTAM#P06748 NPM_HUMAN</a>   | 147.68 | 46           | 2.23E+07 | 10        | 32575     | Nucleophosmin OS=Homo sapiens OX=9606 GN=NPM1 PE=1 SV=2                                     |
| <a href="#">#CONTAM#O46415 FRIL_BOVIN</a>  | 129.49 | 63           | 2.01E+07 | 10        | 19988     | Ferritin light chain OS=Bos taurus OX=9913 GN=FTL<br>PE=2 SV=3                              |
| <a href="#">#CONTAM#P02792 FRIL_HUMAN</a>  | 122.99 | 48           | 1.52E+07 | 9         | 20020     | Ferritin light chain OS=Homo sapiens OX=9606 GN=FTL PE=1 SV=2                               |
| <a href="#">#CONTAM#P55072 TERA_HUMAN</a>  | 199    | 68           | 8.51E+06 | 47        | 89322     | Transitional endoplasmic reticulum ATPase OS=Homo sapiens OX=9606 GN=VCP<br>PE=1 SV=4       |
| <a href="#">#CONTAM#Q01853 TERA_MOUSE</a>  | 199    | 68           | 8.51E+06 | 47        | 89322     | Transitional endoplasmic reticulum ATPase OS=Mus musculus OX=10090 GN=Vcp<br>PE=1 SV=4      |
| <a href="#">#CONTAM#P46462 TERA_RAT</a>    | 199    | 68           | 8.51E+06 | 47        | 89349     | Transitional endoplasmic reticulum ATPase OS=Rattus norvegicus OX=10116<br>GN=Vcp PE=1 SV=3 |
| <a href="#">#CONTAM#P00761 TRYP_PIG</a>    | 93.86  | 34           | 6.47E+06 | 5         | 24409     | Trypsin OS=Sus scrofa OX=9823 PE=1 SV=1                                                     |
| <a href="#">#CONTAM#P04406 G3P_HUMAN</a>   | 153.88 | 58           | 5.76E+06 | 17        | 36053     | Glyceraldehyde-3-phosphate dehydrogenase OS=Homo sapiens OX=9606<br>GN=GAPDH PE=1 SV=3      |

|                            |        |    |          |    |       |                                                                                                                   |
|----------------------------|--------|----|----------|----|-------|-------------------------------------------------------------------------------------------------------------------|
| #CONTAM#Q5R8J7 FRIH_PONAB  | 138.85 | 72 | 5.65E+06 | 13 | 21226 | Ferritin heavy chain OS=Pongo abelii OX=9601 GN=FTH1 PE=2 SV=3                                                    |
| #CONTAM#P02794 FRIH_HUMAN  | 138.85 | 72 | 5.65E+06 | 13 | 21226 | Ferritin heavy chain OS=Homo sapiens OX=9606 GN=FTH1 PE=1 SV=2                                                    |
| #CONTAM#P14618 KPYM_HUMAN  | 168.02 | 53 | 5.50E+06 | 22 | 57937 | Pyruvate kinase PKM OS=Homo sapiens OX=9606 GN=PKM PE=1 SV=4                                                      |
| #CONTAM#Q01105 SET_HUMAN   | 117.82 | 31 | 5.11E+06 | 9  | 33489 | Protein SET OS=Homo sapiens OX=9606 GN=SET<br>PE=1 SV=3                                                           |
| #CONTAM#Q9BXJ4 C1QT3_HUMAN | 100.58 | 21 | 4.95E+06 | 5  | 26994 | Complement C1q tumor necrosis factor-related protein 3 OS=Homo sapiens<br>OX=9606 GN=C1QTNF3 PE=1 SV=1            |
| #CONTAM#Q9BQA1 MEP50_HUMAN | 145.04 | 43 | 4.67E+06 | 11 | 36724 | Methylosome protein 50 OS=Homo sapiens OX=9606 GN=WDR77 PE=1 SV=1                                                 |
| #CONTAM#Q07021 C1QBP_HUMAN | 118.24 | 41 | 4.42E+06 | 7  | 31362 | Complement component 1 Q subcomponent-binding protein mitochondrial OS=Homo<br>sapiens OX=9606 GN=C1QBP PE=1 SV=1 |
| #CONTAM#P04075 ALDOA_HUMAN | 163.86 | 73 | 4.41E+06 | 22 | 39420 | Fructose-bisphosphate aldolase A OS=Homo sapiens OX=9606 GN=ALDOA PE=1<br>SV=2                                    |
| #CONTAM#P02769 ALBU_BOVIN  | 178.52 | 58 | 3.64E+06 | 32 | 69294 | Albumin OS=Bos taurus OX=9913 GN=ALB PE=1 SV=4                                                                    |
| #CONTAM#P15636 API_ACHLY   | 132.47 | 16 | 3.33E+06 | 9  | 68125 | Protease 1 OS=Achromobacter lyticus OX=224 PE=1<br>SV=1                                                           |
| #CONTAM#Q08380 LG3BP_HUMAN | 139.96 | 29 | 2.95E+06 | 14 | 65331 | Galectin-3-binding protein OS=Homo sapiens OX=9606 GN=LGALS3BP PE=1 SV=1                                          |
| #CONTAM#P30048 PRDX3_HUMAN | 108.06 | 31 | 2.82E+06 | 7  | 27693 | Thioredoxin-dependent peroxide reductase mitochondrial OS=Homo sapiens<br>OX=9606 GN=PRDX3 PE=1 SV=3              |
| #CONTAM#Q5REY3 PRDX3_PONAB | 108.06 | 31 | 2.82E+06 | 7  | 27700 | Thioredoxin-dependent peroxide reductase mitochondrial OS=Pongo abelii OX=9601<br>GN=PRDX3 PE=2 SV=1              |

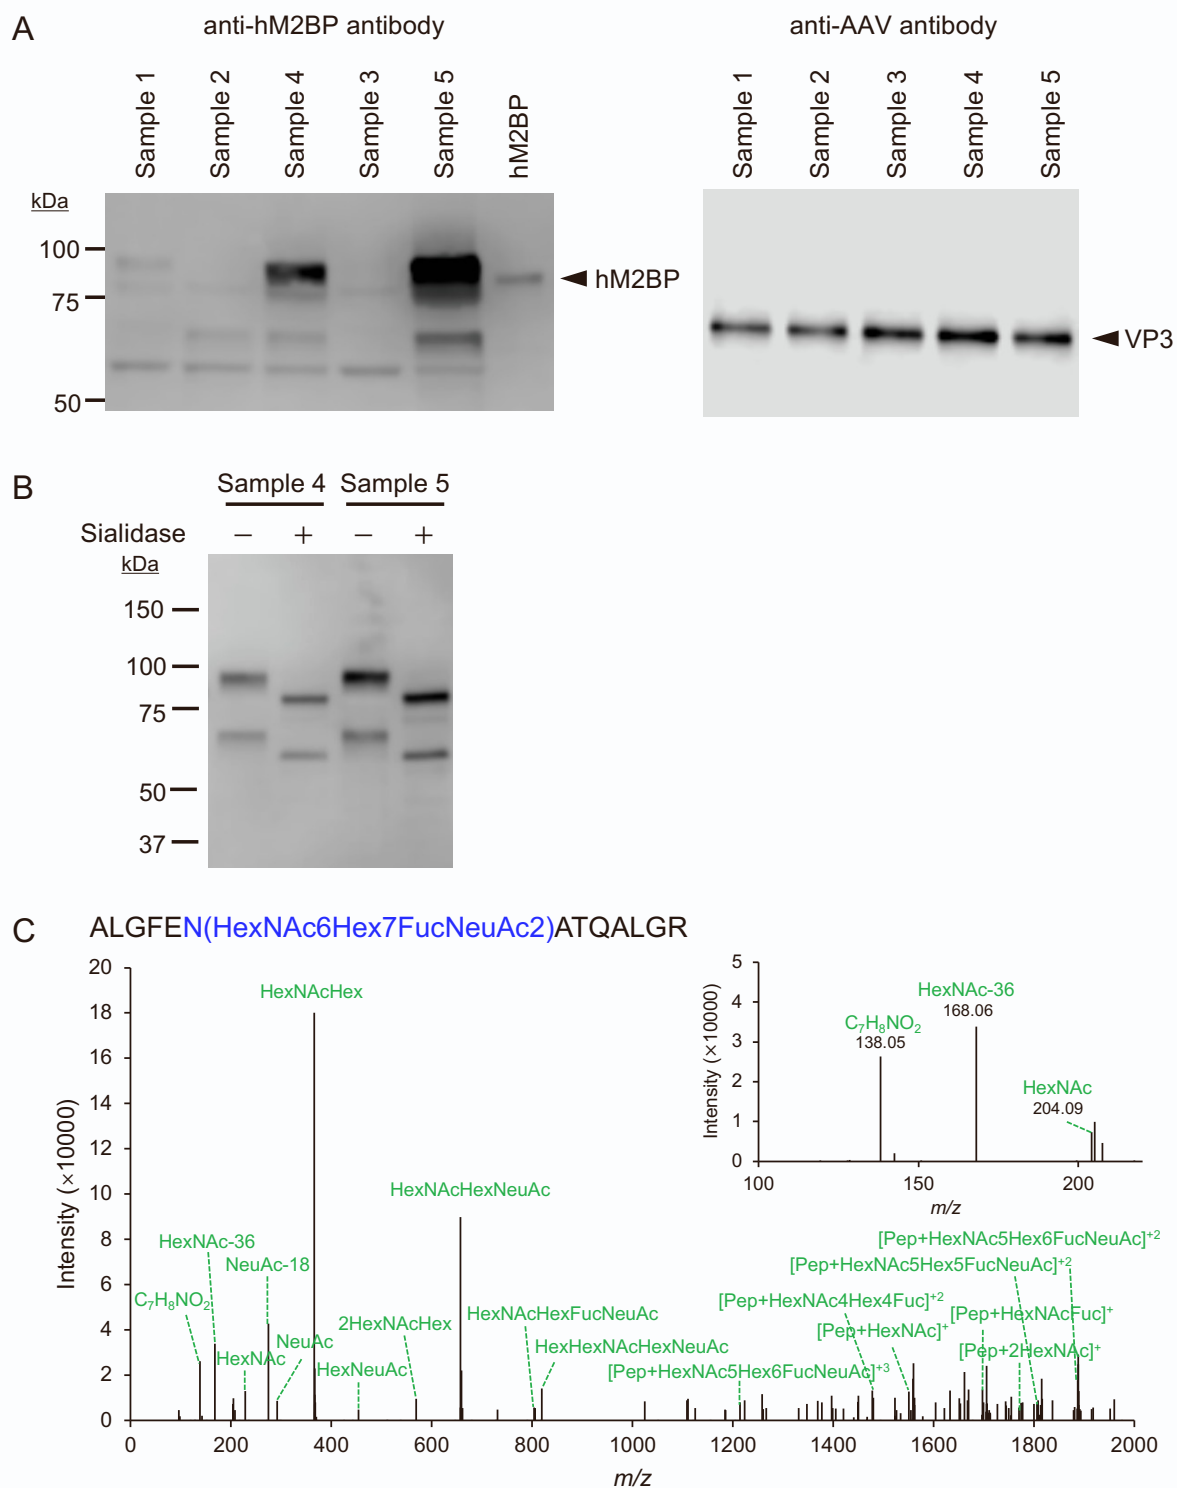

**Figure S1.** (A) Western blots of Samples 1–5 detected with anti-hM2BP antibody (left) and anti-AAV viral proteins antibody (right). (B) Western blot analysis of Samples 4 and 5 detected with anti-hM2BP antibody with and without sialidase treatment. (C) The CID mass spectra of hM2BP A64–R76 modified with HexNAc6Hex7FucNeuAc2 in Sample 4.

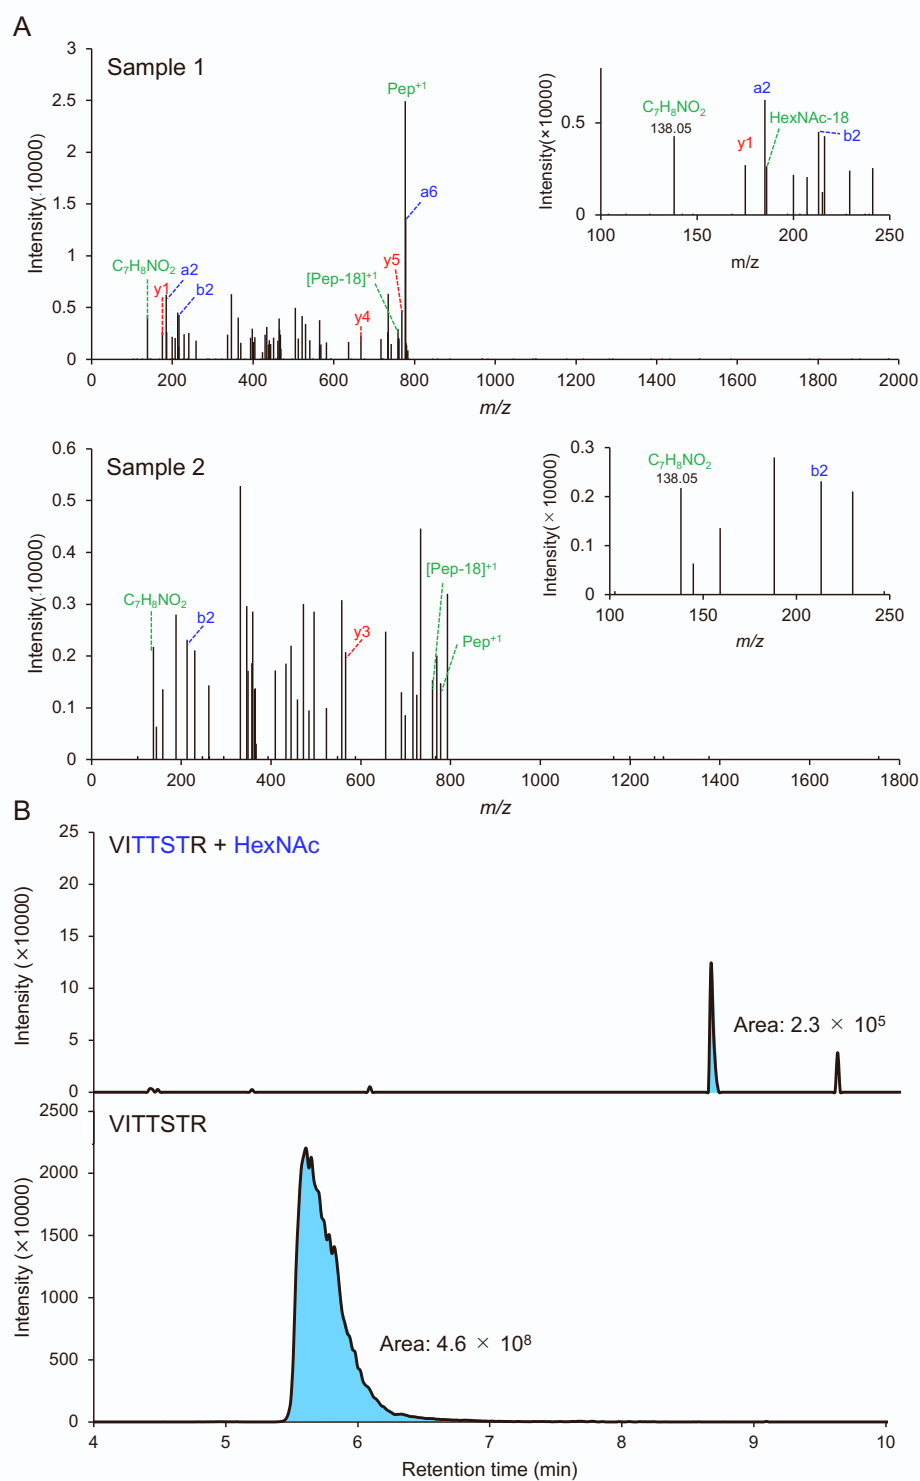

**Figure S2.** (A) The CID mass spectra of V239–R245 modified with HexNAc for Samples 1 and 2. (B) Extracted ion chromatograms (XICs) of V239–R245 modified with HexNAc ( $m/z$  389.2284) (top) and unmodified V239–R245 ( $m/z$  490.7697) (bottom). Each MS area was calculated using Byos software. The amount of peptide modified with *O*-GlcNAc ( $a$ ) was calculated with the equation:  $a = [2.3 \times 10^5 \text{ of } O\text{-GlcNAc modified peptide's MS area}] / ([O\text{-GlcNAc modified peptide's MS area}] + [4.6 \times 10^8 \text{ of unmodified peptide's MS area}])$ . The percentage of particle modified with *O*-GlcNAc ( $p$ ) was calculated with the equation:  $p = 1^{60} - (1-0.0005)^{60}$ .

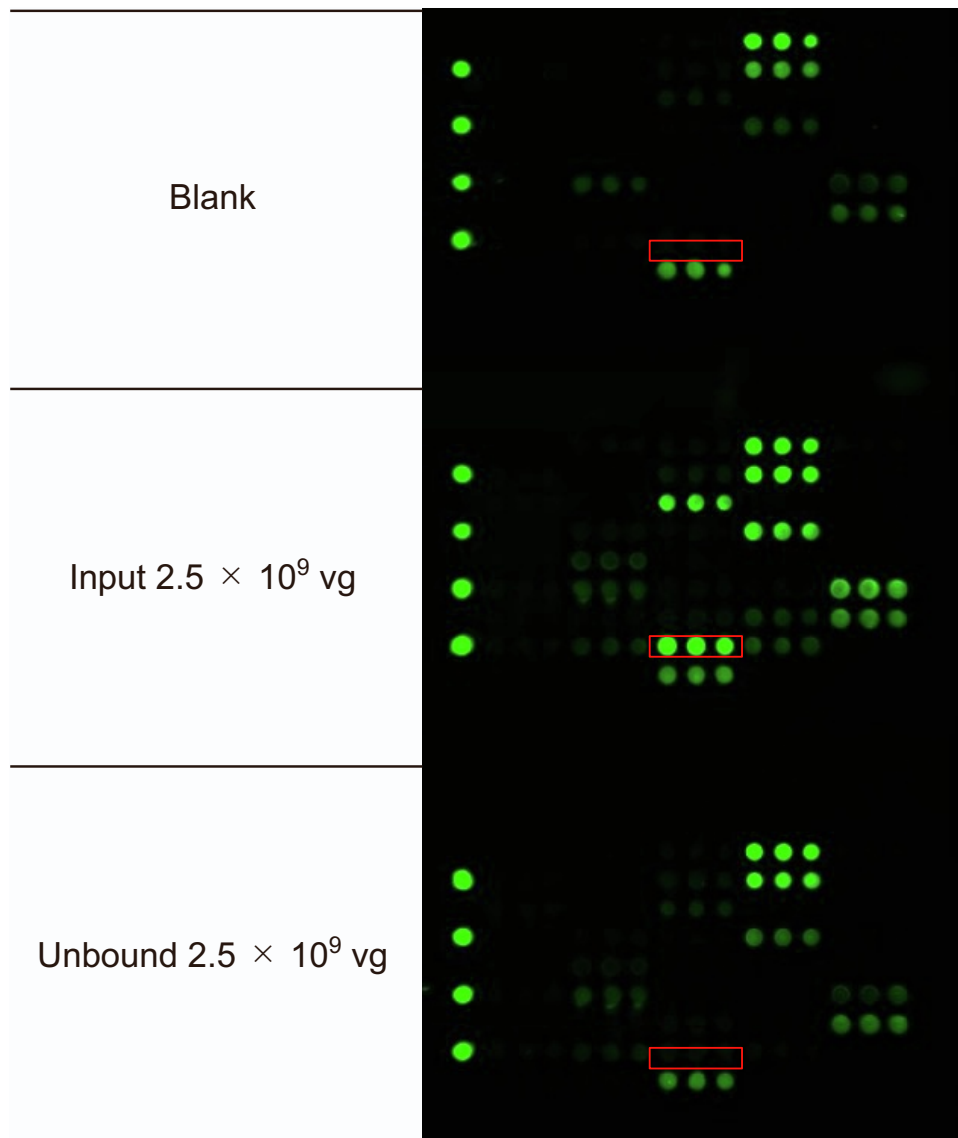

**Figure S3.** The signals detected by lectin microarray for  $2.5 \times 10^9$  vg rAAV6 samples as described for western blotting. The area of ABA signals is marked by in a red box. The Blank array shows the high signals of *Lycopersicon esculentum* lectin (LEL), *Solanum tuberosum* lectin (STL), and *Urtica dioica* lectin (UDA) in triplicate spots caused by binding to the detection antibody. The signals of those lectins were therefore excluded from the lectin microarray analysis.

DRVITT(HexNAc)STRTWALPTYNNHLYK

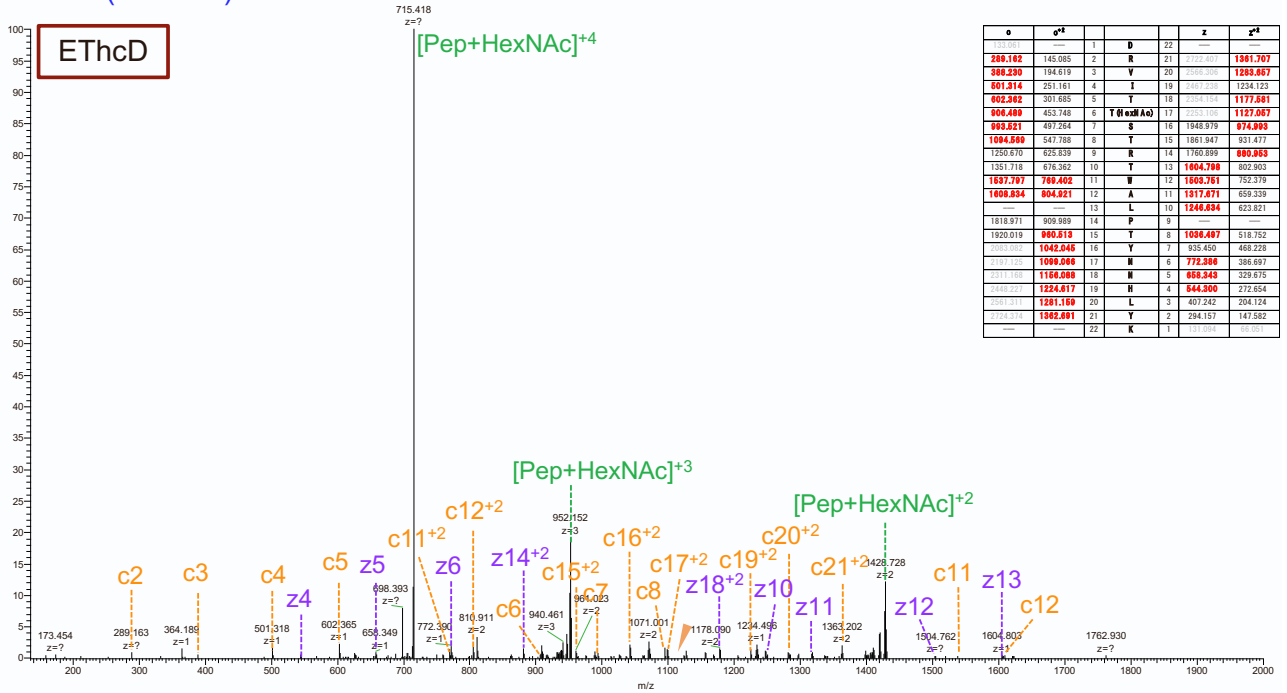

DRVITTSTRTWALPTYNNHLYK + HexNAc

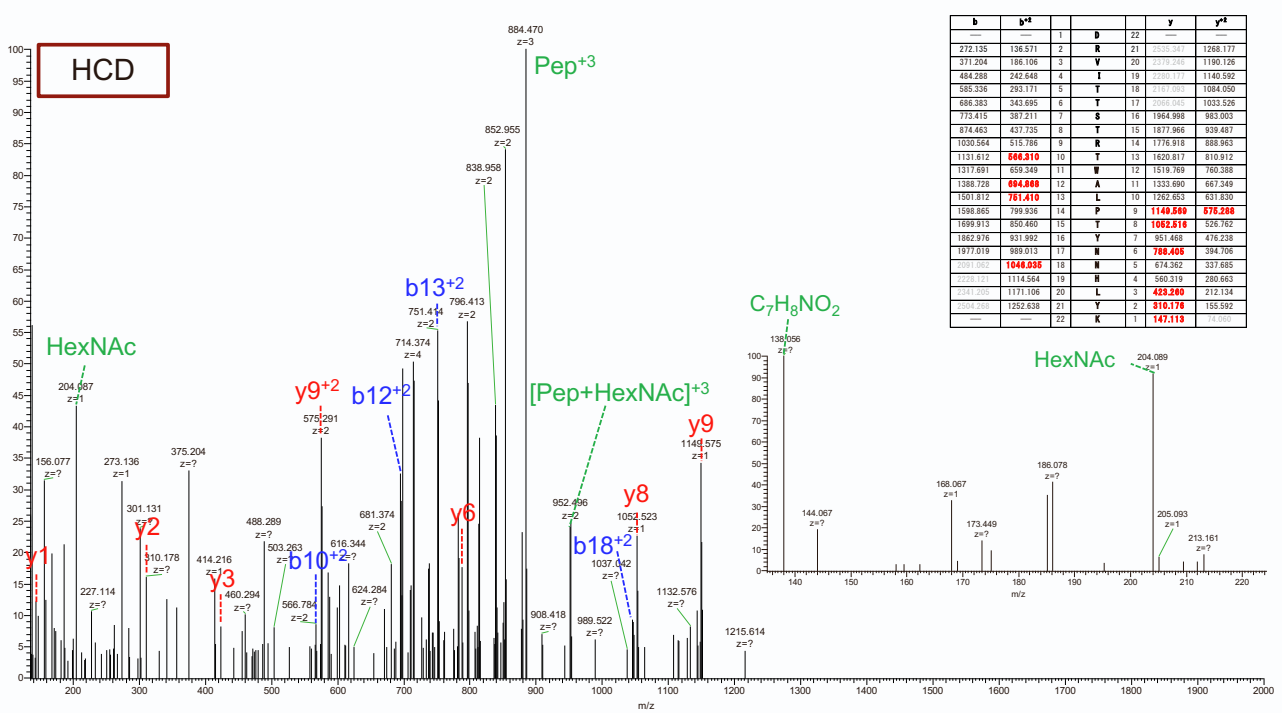

Figure S4. The EThcD and HCD mass spectra of D237–K258 with HexNAc identified in the unbound fraction of rAAV6.



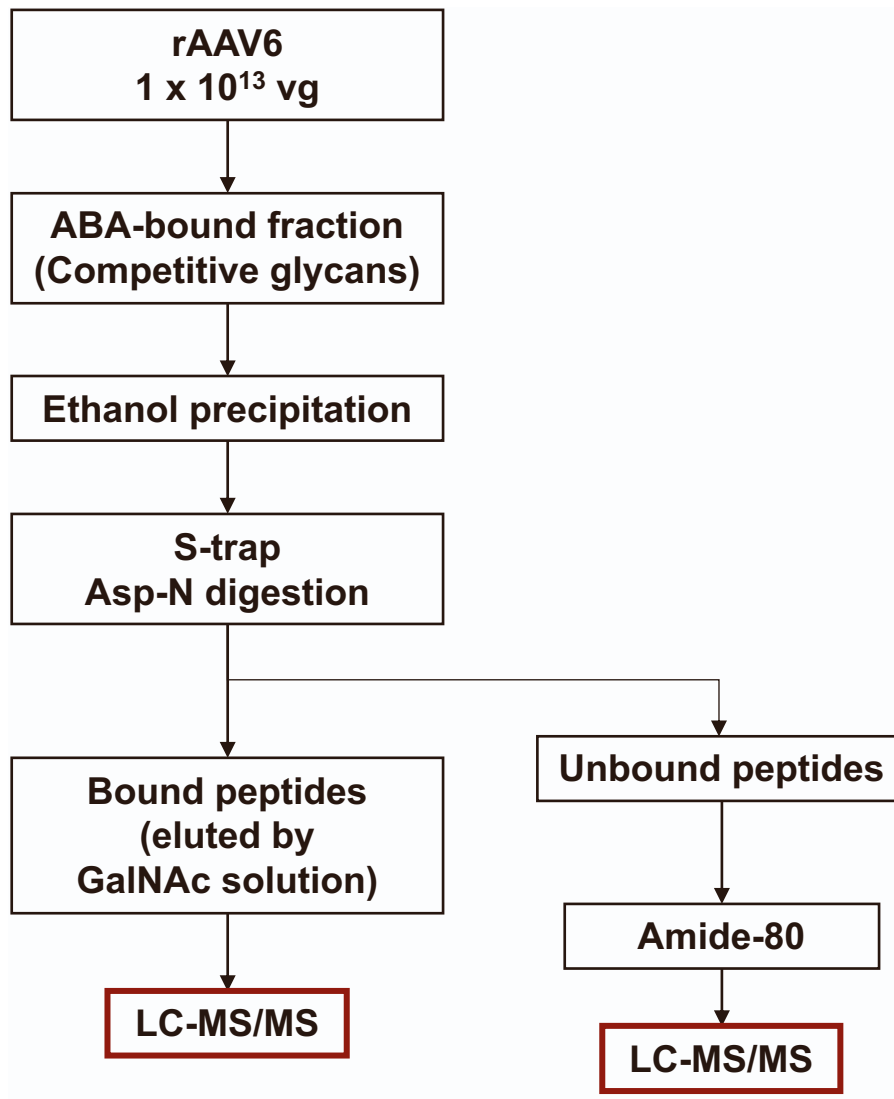

**Figure S5.** The experimental workflow of LC-MS/MS analysis for the bound fraction of rAAV6 using Sample 1.

A

| O-glycan                          |          |       |           |     |        |      |       |
|-----------------------------------|----------|-------|-----------|-----|--------|------|-------|
| DSSSGIGKTGQQPAKRLNFGQTG (154-177) |          |       |           |     |        |      |       |
| cluster_no:1/member:3             |          |       |           |     |        |      |       |
| peak_no                           | m/z      | rt    | intensity | Hex | HexNAc | dHex | NeuAc |
| 1                                 | 2462.268 | 40.99 | 158184080 | 0   | 0      | 0    | 0     |
| 570                               | 2665.354 | 40.79 | 184328    | 0   | 1      | 0    | 0     |
| 217                               | 2665.354 | 39.99 | 639783    | 0   | 0      | 0    | 0     |
| 878                               | 2868.434 | 39.59 | 98248     | 0   | 2      | 0    | 0     |

| O-glycan                                         |          |       |           |     |        |      |       |
|--------------------------------------------------|----------|-------|-----------|-----|--------|------|-------|
| DPQPLGEPPTPAAVGPTTM (ox)ASGGGAPM (ox)A (184-212) |          |       |           |     |        |      |       |
| cluster_no:5/member:10                           |          |       |           |     |        |      |       |
| peak_no                                          | m/z      | rt    | intensity | Hex | HexNAc | dHex | NeuAc |
| 497                                              | 2881.321 | 61.9  | 302018    | 0   | 1      | 0    | 0     |
| 346                                              | 3043.372 | 61.06 | 572997    | 0   | 0      | 0    | 0     |
| 1985                                             | 3043.376 | 62.69 | 21129     | 1   | 1      | 0    | 0     |
| 1102                                             | 3043.378 | 62.01 | 66605     | 0   | 0      | 0    | 0     |
| 636                                              | 3084.399 | 60.83 | 191739    | 0   | 2      | 0    | 0     |
| 1970                                             | 3246.451 | 59.43 | 21498     | 0   | 0      | 0    | 0     |
| 879                                              | 3246.452 | 60.08 | 101782    | 1   | 2      | 0    | 0     |
| 2698                                             | 3246.453 | 58.76 | 9019      | 0   | 0      | 0    | 0     |
| 2361                                             | 3334.466 | 64.29 | 13970     | 0   | 0      | 0    | 0     |
| 596                                              | 3334.469 | 62.63 | 215796    | 1   | 1      | 0    | 1     |
| 1677                                             | 3334.469 | 63.46 | 30550     | 0   | 0      | 0    | 0     |
| 1041                                             | 3334.47  | 60.26 | 74799     | 0   | 0      | 0    | 0     |
| 2550                                             | 3408.509 | 58.76 | 11121     | 2   | 2      | 0    | 0     |
| 2117                                             | 3537.548 | 60.35 | 18564     | 0   | 0      | 0    | 0     |
| 780                                              | 3537.549 | 61.58 | 123455    | 1   | 2      | 0    | 1     |
| 1480                                             | 3537.549 | 59.21 | 38553     | 0   | 0      | 0    | 0     |
| 282                                              | 3625.561 | 61.06 | 774921    | 0   | 0      | 0    | 0     |
| 1706                                             | 3625.563 | 63.29 | 29419     | 1   | 1      | 0    | 2     |
| 1945                                             | 3625.566 | 64.73 | 22098     | 0   | 0      | 0    | 0     |
| 431                                              | 3828.646 | 59.87 | 388762    | 1   | 2      | 0    | 2     |
| 1005                                             | 3845.674 | 59.87 | 81457     | 2   | 2      | 1    | 1     |

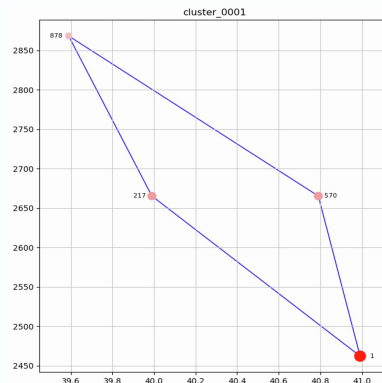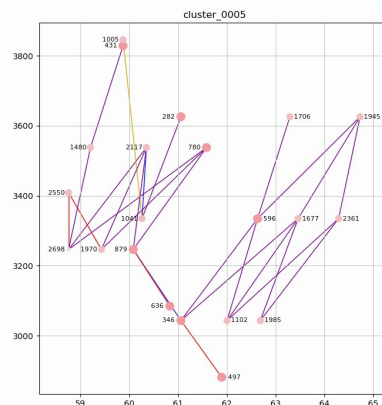

B DSSSGIGKTGQQPAKRLNFGQTG

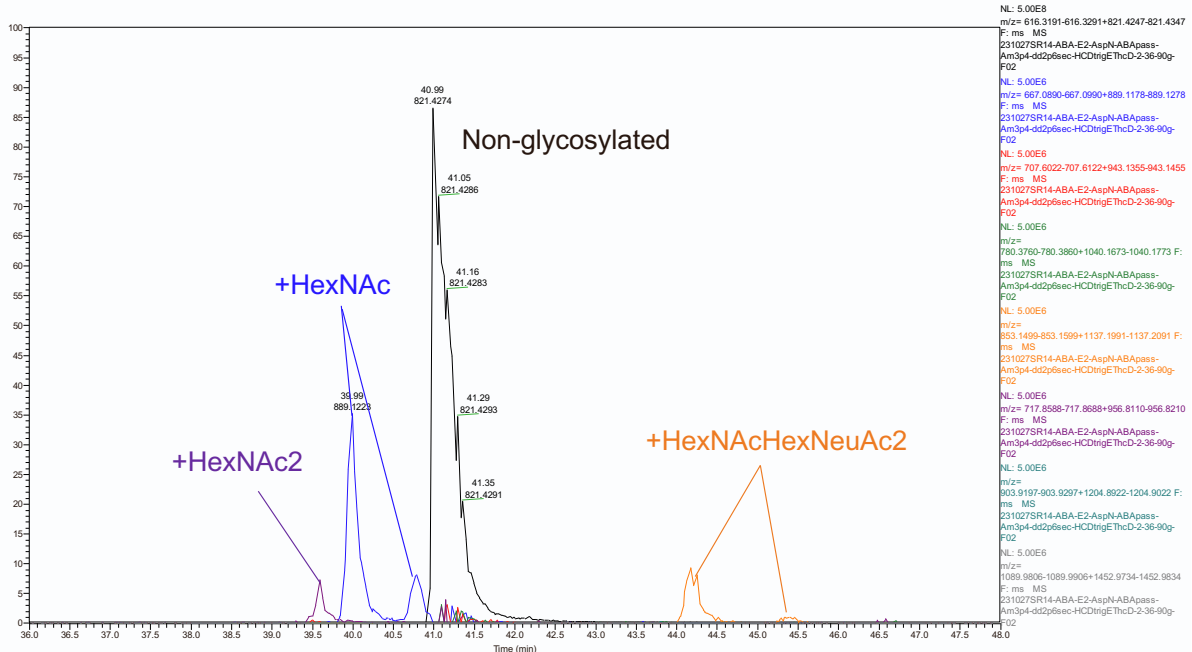

**Figure S6.** (A) Glycopeptide clusters assigned by GRable for D156–G177 and D184–A212 of the fractionated rAAV6. (B) XICs of D156–G177 modified with mucin-type *O*-glycan clusters. The signal of non-glycosylated peptide ( $m/z$  821.4297  $\pm$  0.005) is colored black, HexNAc ( $m/z$  889.1228  $\pm$  0.005) is blue, HexNAc2 ( $m/z$  956.8160  $\pm$  0.005) is purple and HexNAcHexNeuAc2 ( $m/z$  1137.1941  $\pm$  0.005) is orange.

DSSSGIGK**T**(HexNAc)GQQPAKKRLNFGQTG

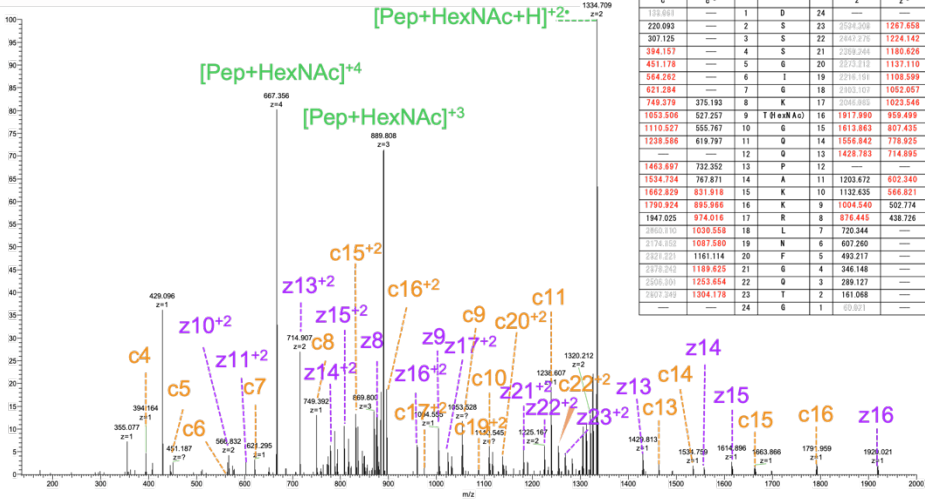

| m/z      | Charge | Label                       |
|----------|--------|-----------------------------|
| 1334.705 | +2     | [Pep+HexNAc+H] <sup>+</sup> |
| 667.354  | +4     | [Pep+HexNAc] <sup>+</sup>   |
| 889.808  | +3     | [Pep+HexNAc] <sup>+</sup>   |
| 429.096  | +1     | z1                          |
| 394.164  | +1     | c4                          |
| 355.077  | +1     | c5                          |
| 441.187  | +1     | c6                          |
| 568.432  | +1     | c7                          |
| 714.902  | +2     | z8                          |
| 714.902  | +2     | c8                          |
| 749.360  | +2     | z9                          |
| 889.808  | +3     | z10+2                       |
| 889.808  | +3     | c9                          |
| 924.266  | +3     | z11+2                       |
| 924.266  | +3     | c10                         |
| 1059.724 | +3     | z12+2                       |
| 1059.724 | +3     | c11                         |
| 1194.182 | +3     | z13+2                       |
| 1194.182 | +3     | c12                         |
| 1328.640 | +3     | z14+2                       |
| 1328.640 | +3     | c13                         |
| 1463.098 | +3     | z15+2                       |
| 1463.098 | +3     | c14                         |
| 1597.556 | +3     | z16+2                       |
| 1597.556 | +3     | c15                         |
| 1732.014 | +3     | z17+2                       |
| 1732.014 | +3     | c16                         |
| 1866.472 | +3     | z18+2                       |
| 1866.472 | +3     | c17                         |
| 2000.930 | +3     | z19+2                       |
| 2000.930 | +3     | c18                         |

DSS(HexNAc)SGIGK**T**GQQPAKKRLNFGQTG

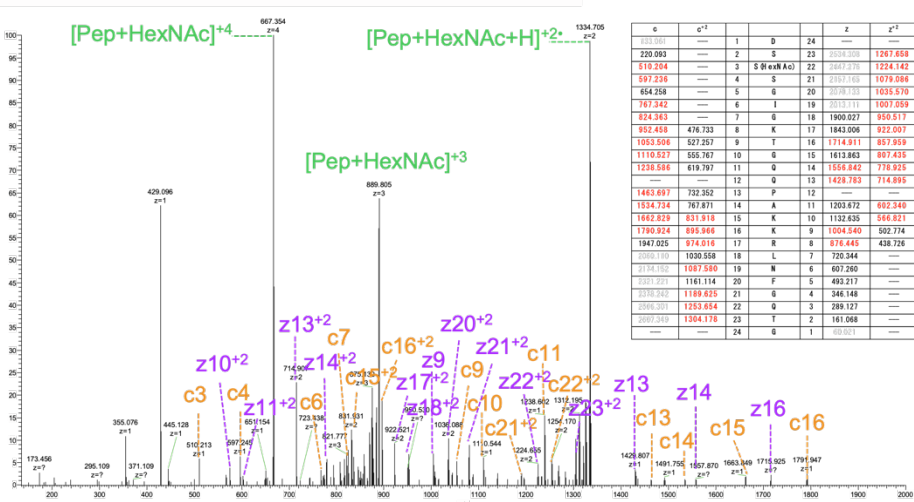

| m/z      | Charge | Label                       |
|----------|--------|-----------------------------|
| 1334.705 | +2     | [Pep+HexNAc+H] <sup>+</sup> |
| 667.354  | +4     | [Pep+HexNAc] <sup>+</sup>   |
| 889.805  | +3     | [Pep+HexNAc] <sup>+</sup>   |
| 429.096  | +1     | z1                          |
| 355.076  | +1     | c3                          |
| 445.128  | +1     | c4                          |
| 510.213  | +1     | c5                          |
| 597.298  | +1     | c6                          |
| 651.154  | +1     | c7                          |
| 714.902  | +2     | z8                          |
| 714.902  | +2     | c8                          |
| 749.360  | +2     | z9                          |
| 889.805  | +3     | z10+2                       |
| 889.805  | +3     | c9                          |
| 924.266  | +3     | z11+2                       |
| 924.266  | +3     | c10                         |
| 1059.724 | +3     | z12+2                       |
| 1059.724 | +3     | c11                         |
| 1194.182 | +3     | z13+2                       |
| 1194.182 | +3     | c12                         |
| 1328.640 | +3     | z14+2                       |
| 1328.640 | +3     | c13                         |
| 1463.098 | +3     | z15+2                       |
| 1463.098 | +3     | c14                         |
| 1597.556 | +3     | z16+2                       |
| 1597.556 | +3     | c15                         |
| 1732.014 | +3     | z17+2                       |
| 1732.014 | +3     | c16                         |
| 1866.472 | +3     | z18+2                       |
| 1866.472 | +3     | c17                         |
| 2000.930 | +3     | z19+2                       |
| 2000.930 | +3     | c18                         |

DSSSGIGK**T**(HexNAcHexNeuAc2)GQQPAKKRLNFGQTG

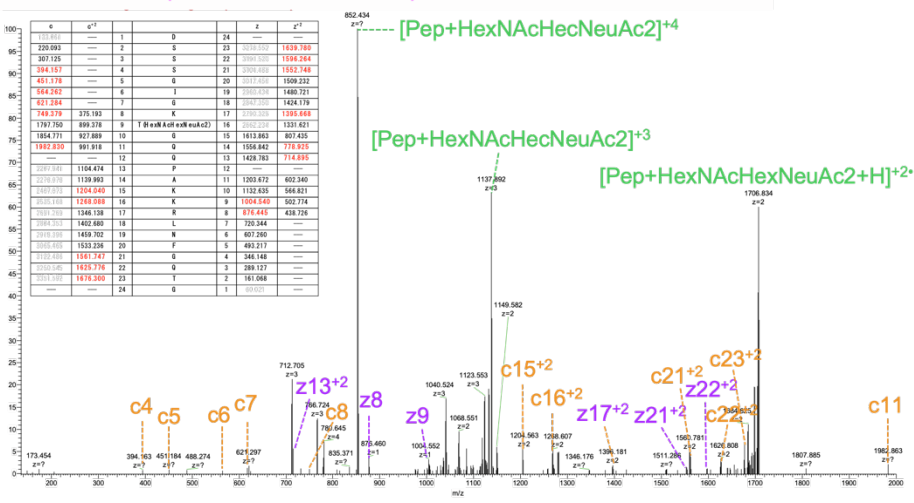

| m/z      | Charge | Label                                |
|----------|--------|--------------------------------------|
| 852.434  | +4     | [Pep+HexNAcHecNeuAc2] <sup>+</sup>   |
| 1137.892 | +3     | [Pep+HexNAcHecNeuAc2] <sup>+</sup>   |
| 1706.834 | +2     | [Pep+HexNAcHexNeuAc2+H] <sup>+</sup> |
| 429.096  | +1     | z1                                   |
| 394.163  | +1     | c4                                   |
| 451.184  | +1     | c5                                   |
| 488.274  | +1     | c6                                   |
| 625.297  | +1     | c7                                   |
| 712.705  | +2     | z8                                   |
| 712.705  | +2     | c8                                   |
| 749.360  | +2     | z9                                   |
| 852.434  | +4     | z10+2                                |
| 852.434  | +4     | c9                                   |
| 924.266  | +3     | z11+2                                |
| 924.266  | +3     | c10                                  |
| 1059.724 | +3     | z12+2                                |
| 1059.724 | +3     | c11                                  |
| 1194.182 | +3     | z13+2                                |
| 1194.182 | +3     | c12                                  |
| 1328.640 | +3     | z14+2                                |
| 1328.640 | +3     | c13                                  |
| 1463.098 | +3     | z15+2                                |
| 1463.098 | +3     | c14                                  |
| 1597.556 | +3     | z16+2                                |
| 1597.556 | +3     | c15                                  |
| 1732.014 | +3     | z17+2                                |
| 1732.014 | +3     | c16                                  |
| 1866.472 | +3     | z18+2                                |
| 1866.472 | +3     | c17                                  |
| 2000.930 | +3     | z19+2                                |
| 2000.930 | +3     | c18                                  |

Figure S7. The EThcD mass spectra of D156–G177 modified with HexNAc at T162 (top), HexNAc at S156 (middle) and HexNAcHexNeuAc2 (bottom).

DSSSGIGK**T**GQQPAKKRLNFGQTG + HexNAc

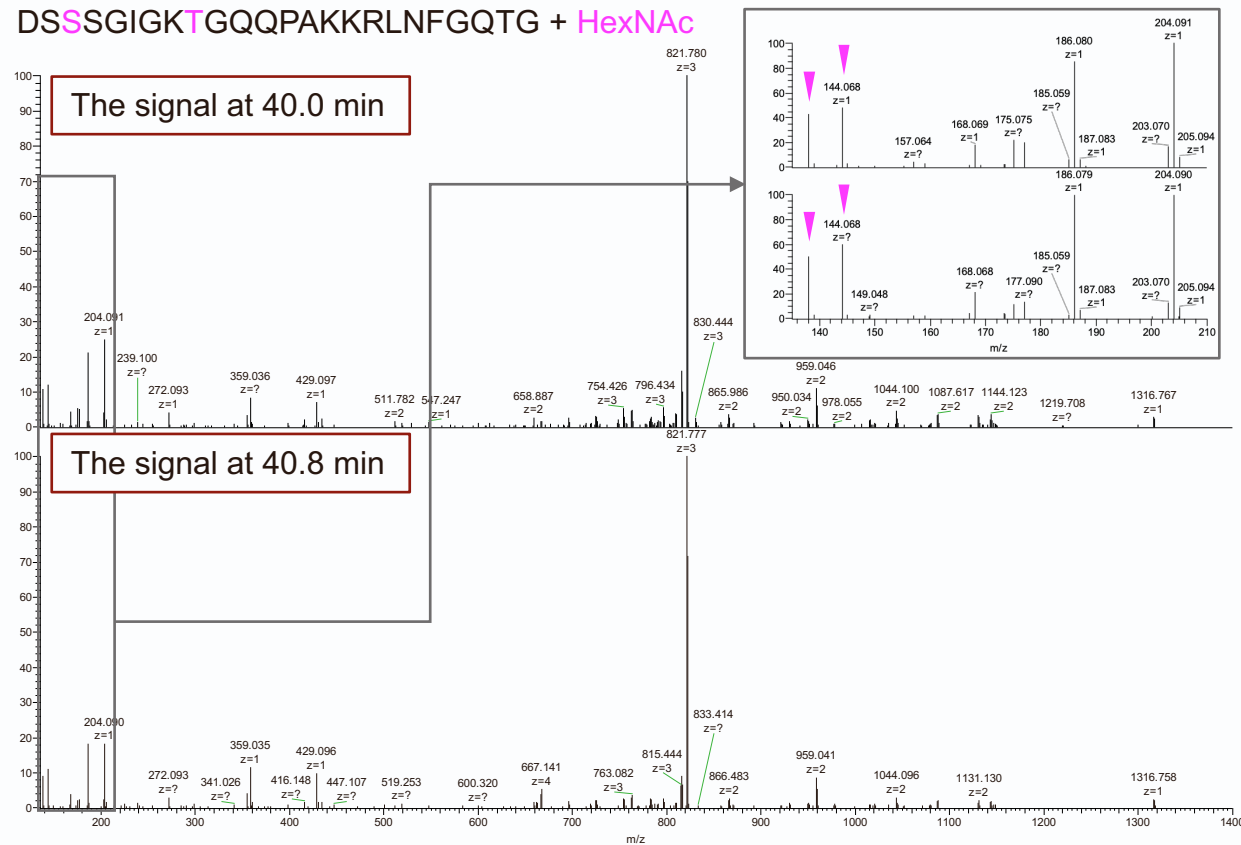

**Figure S8.** The HCD mass spectra of the signals at 40.0 min and 40.8 min for D156–G177 modified with HexNAc. The signals  $m/z$  138 and  $m/z$  144 showed similar intensities.

DPQPLGEPPAT(HexNAc)PAAVGPT(HexNAc)TM(oxi)ASGGGAPM(oxi)A

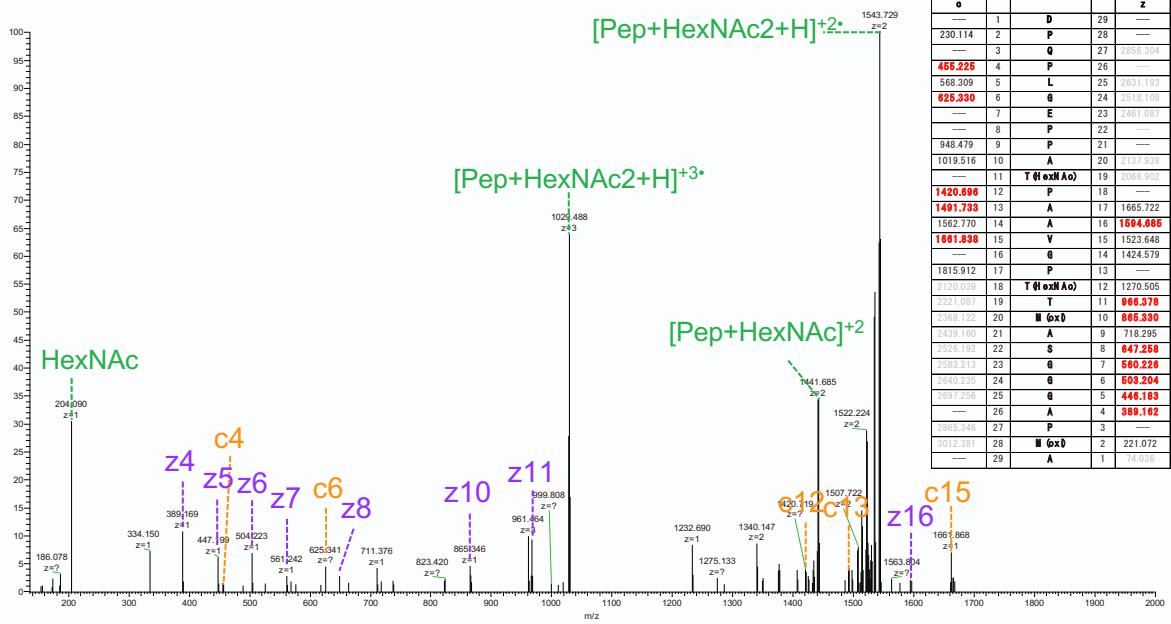

DPQPLGEPPAT(HexNAcHexNeuAc2)PAAVGPT(HexNAc)TM(oxi)ASGGGAPM(oxi)A

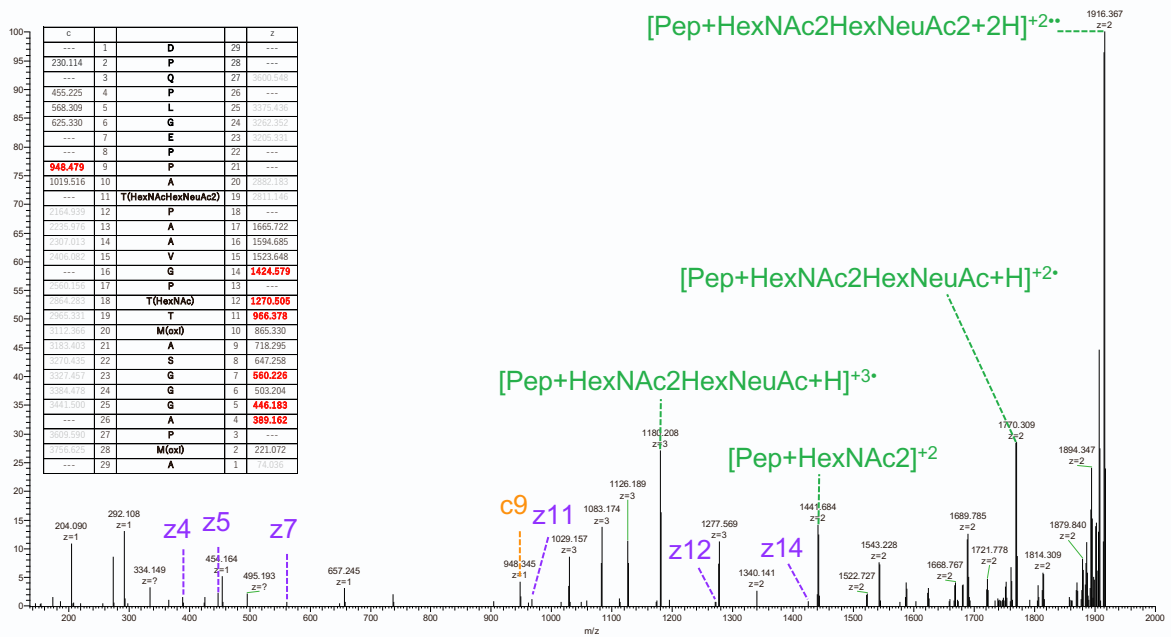

Figure S9. The EThcD mass spectra of D184–A212 modified with HexNAc at T194 and T201 (top), and HexNAcHexNeuAc2 at S194 and HexNAc at T201 (bottom).

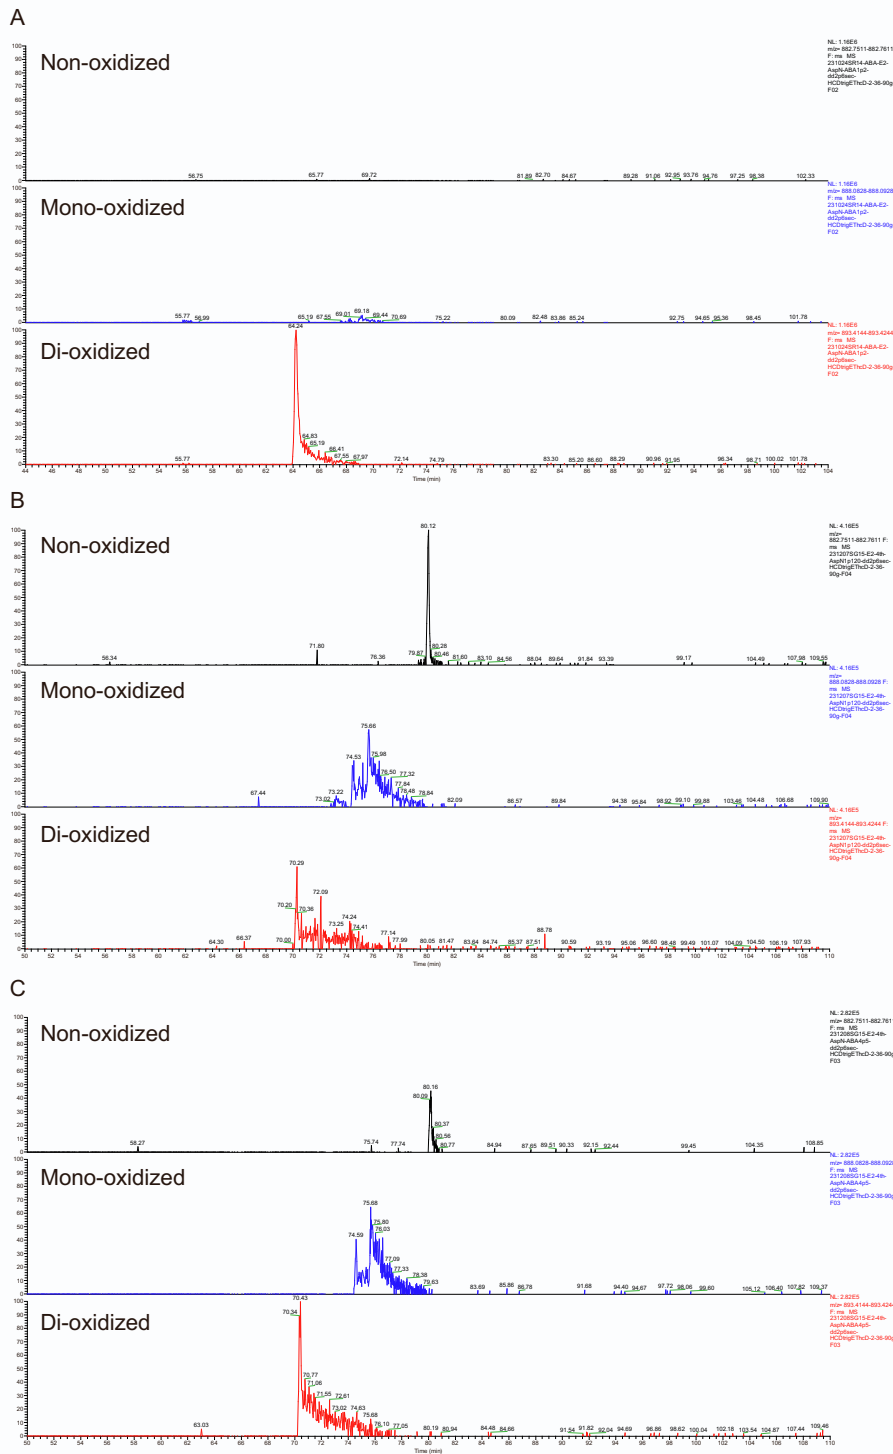

**Figure S10.** XICs of D184-A212 modified by non- ( $m/z$  882.7561  $\pm$  0.005; top), mono- ( $m/z$  882.0878  $\pm$  0.005; middle), and di-oxidized form ( $m/z$  893.4194  $\pm$  0.005; bottom) in (A) the ABA-bound fraction of the peptides digested from ABA-bound rAAV6 with the S-trap column, (B) the peptides digested from ABA-bound rAAV6 without the S-trap column, and (C) the peptides digested from ABA-bound rAAV6 with the S-trap column. The non-oxidized form was abundant for rAAV6 digested without the S-trap digestion, whereas the ratio of mono- and di-oxidized form to non-oxidized form increased after the S-trap digestion. We therefore suspect that some reagent used in the S-trap digestion may accelerate the oxidation of methionine.

DPQPLGEPPATPAAVGPTTM(oxi)ASGGGAPM(oxi)A + HexNAc2HexNeuAc

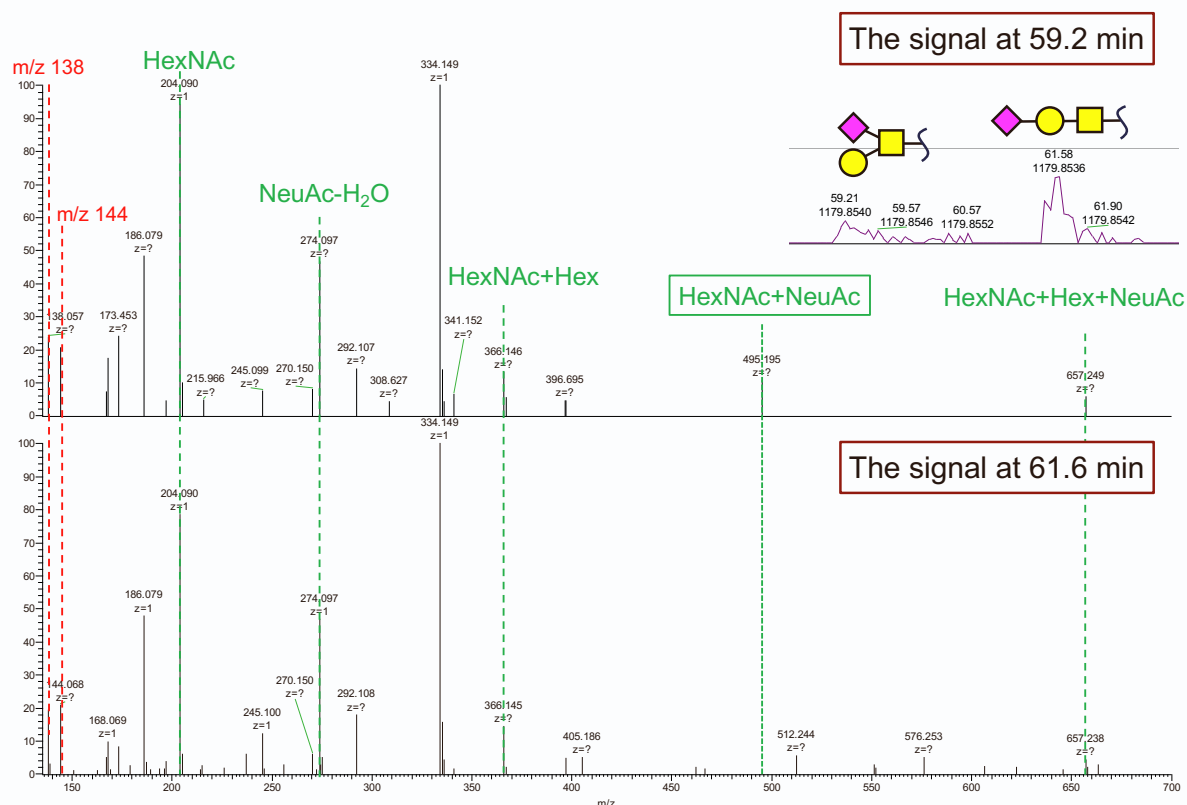

**Figure S11.** The HCD mass spectra of the signals at 59.2 min and 61.6 min for D184–A212 modified with HexNAc2HexNeuAc. The signals  $m/z$  138 and  $m/z$  144 showed similar intensities.

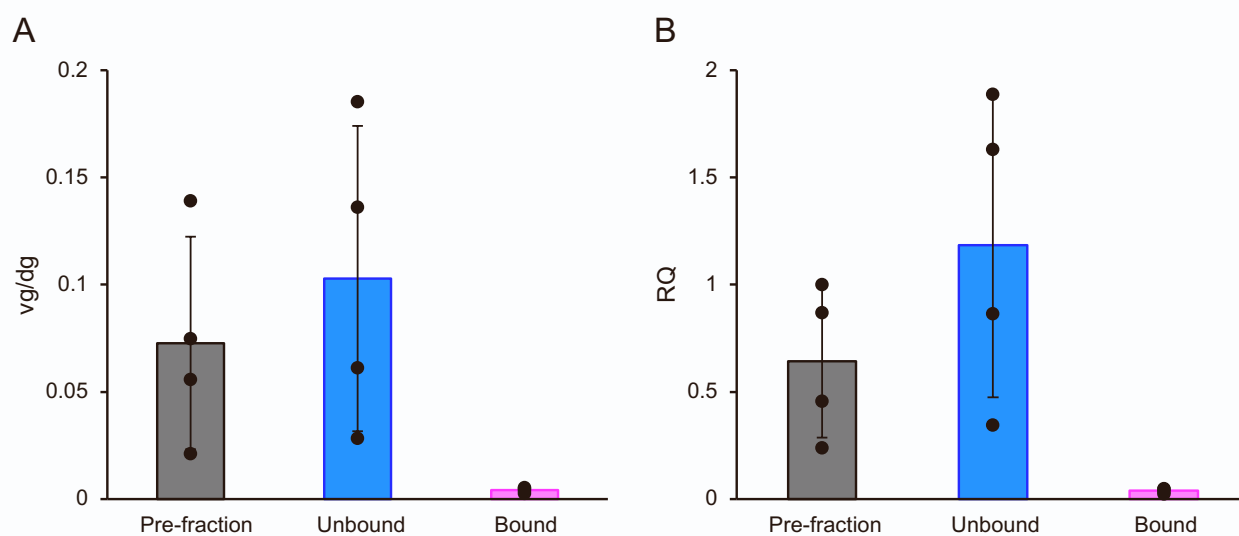

**Figure S12.** (A) rAAV6 genomes per mouse diploid genome (vg/dg) and (B) *hFIX* mRNA levels in liver tissue were determined using qPCR 8 weeks after rAAV6 administration. Individual points are shown in black circles, and error bars shows the SD value for  $n = 4$ .

DPQPLGEPPATPAAVGPTTM(oxi)ASGGGAPM(oxi)A

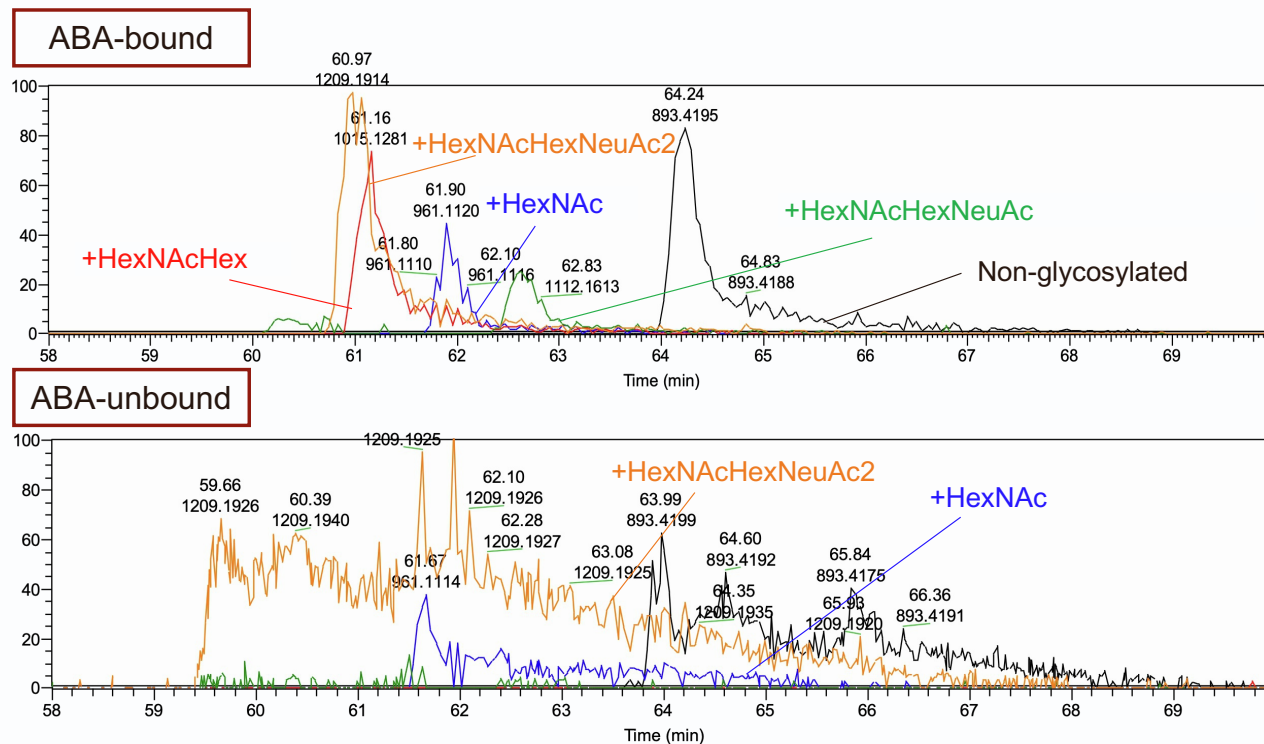

**Figure S13.** XICs of D184–A212 modified with mucin-type *O*-glycan clusters. The signal of non-glycosylated peptide ( $m/z$  893.4194  $\pm$  0.005) is colored black, HexNAc ( $m/z$  961.1025  $\pm$  0.005) is blue, HexNAcHex2 ( $m/z$  1015.1231  $\pm$  0.005) is red, HexNAcHexNeuAc ( $m/z$  1112.1619  $\pm$  0.005) is green, and HexNAcHexNeuAc2 ( $m/z$  1209.1937  $\pm$  0.005) is orange.
